# Supplementary material for: The tunable electronic band structure of a AlP3/Cs3Bi2I6Cl3 van der Waals heterostructure induced by an electric field: a first-principles study
Source: Royal Society of Chemistry journal article supplement (doi:10.1039/d4cp03918a), 2024-12-20
Supplement: d4cp03918a1.pdf [file d4cp03918a1.pdf]

## Supplementary Material

of

### **Tunable electronic band structure of $\text{AlP}_3/\text{Cs}_3\text{Bi}_2\text{I}_6\text{Cl}_3$ van der Waals heterostructure induced by electric field: a first-principles study**

Cheng-sheng Liao<sup>a</sup>, Lin Lang<sup>a</sup>, Qiu-yi Wang<sup>a</sup>, Yu-qing Zhao<sup>b</sup>, Zhuo-liang

Yu<sup>a,\*</sup>

<sup>a</sup> *Key Laboratory of Hunan Province on Information Photonics and  
Freespace Optical Communications, School of Physics and Electronics  
Science, Hunan Institute of Science and Technology, Yueyang 414006,  
People's Republic of China*

<sup>b</sup> *School of Physics and Electronics Science, Hunan University of Science  
and Technology, Xiangtan 411201, People's Republic of China*

E-mail: 12021016@hnist.edu.cn

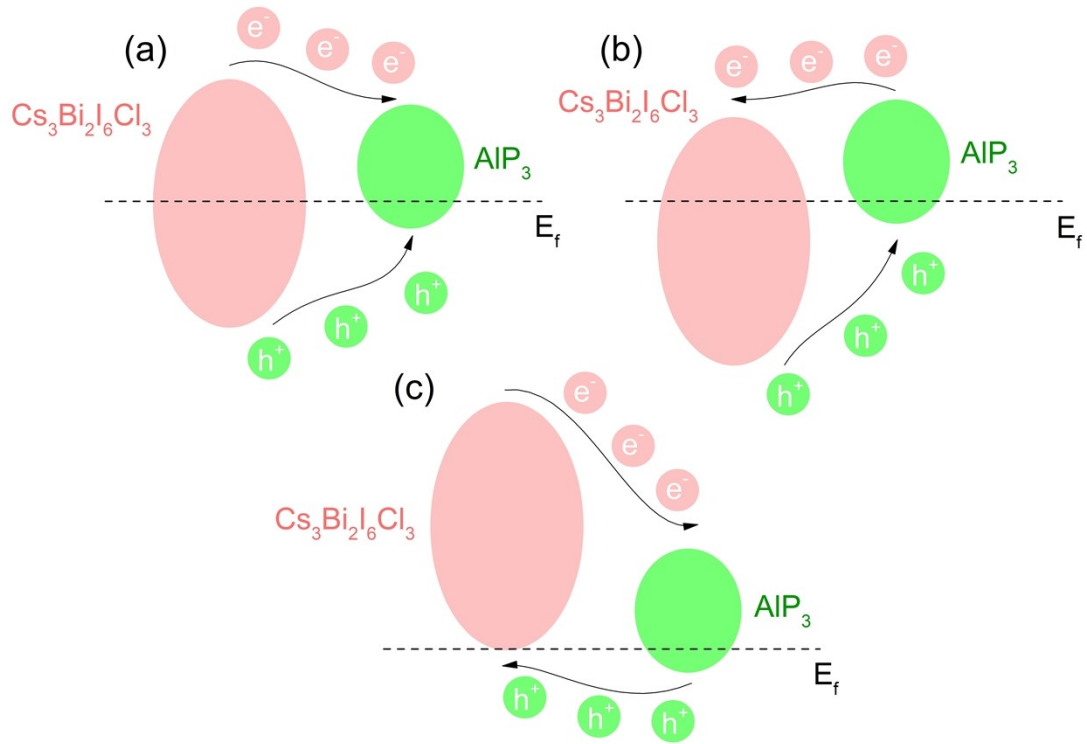

**Figure S1** Schematic illustration of the band alignment of  $\text{AIP}_3/\text{Cs}_3\text{Bi}_2\text{I}_6\text{Cl}_3$  vdWH under an external electric field of (a)  $0 \text{ V/\AA}$ , (b)  $0.1 \text{ V/\AA}$  and (c)  $0.2 \text{ V/\AA}$ , respectively

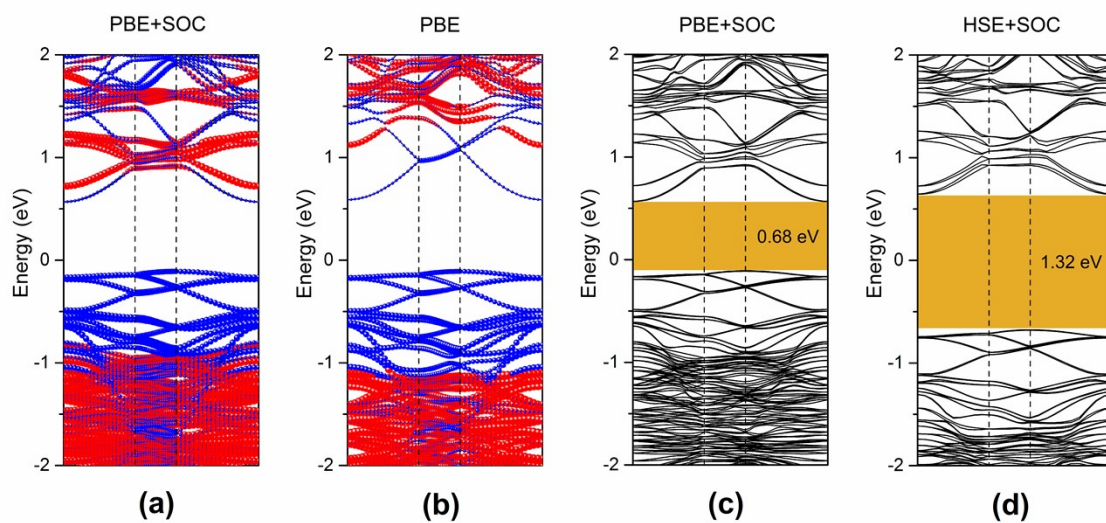

**Figure S2** (a) The projected band structure of  $\text{AlP}_3/\text{Cs}_3\text{Bi}_2\text{I}_6\text{Cl}_3$  vdWH calculated by PBE+SOC functional. (b) The projected band structure of  $\text{AlP}_3/\text{Cs}_3\text{Bi}_2\text{I}_6\text{Cl}_3$  vdWH calculated by PBE functional. (c) The electronic band structure of  $\text{AlP}_3/\text{Cs}_3\text{Bi}_2\text{I}_6\text{Cl}_3$  vdWH calculated by PBE+SOC functional. (d) The electronic band structure of  $\text{AlP}_3/\text{Cs}_3\text{Bi}_2\text{I}_6\text{Cl}_3$  vdWH calculated by HSE+SOC functional.

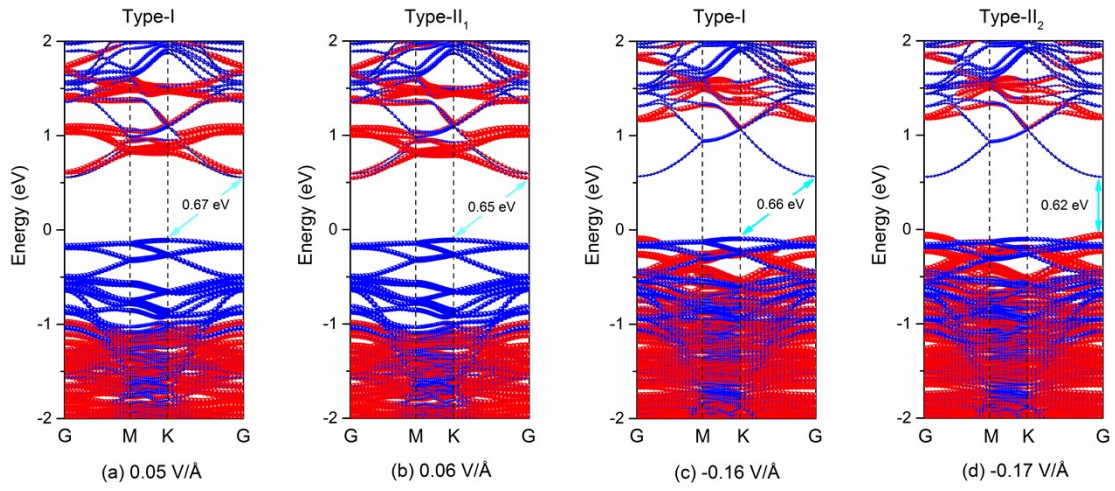

**Figure S3.** The electronic band structures under external electric fields of (a)  $0.05 \text{ V/\AA}$ , (b)  $0.06 \text{ V/\AA}$ , (c)  $-0.16 \text{ V/\AA}$  and (d)  $-0.17 \text{ V/\AA}$  for  $\text{AlP}_3/\text{Cs}_3\text{Bi}_2\text{I}_6\text{Cl}_3$  vdWH. The Fermi level is set to zero.
